# Supplementary material for: Characterization of psychrotrophic and thermoduric bacteria in raw milk using a multi-omics approach
Source: PubMed Central journal article supplement (PMC11540130; doi:10.1099/mgen.0.001311), 2024-11-06
Supplement: mgen-10-01311-s002.pdf [file mgen-10-01311-s002.pdf]

## **SUPPLEMENTARY MATERIALS**

**File S1** Function of identified proteins and MEROPS annotation with taxonomy based on metagenome (uploaded as excel)

**Fig.S1** Rarefaction curves of Shannon's diversity index for raw milk samples collected from dairy farm A and dairy farm B.

**Fig.S2** Principal coordinates analysis (PCoA) of the bacterial community structure from raw milk samples collected from dairy farm A and dairy farm B

**Fig.S3** Metaproteomics data. a) Analysis of the bacterial proteins in raw milk samples obtained from dairy farm A and dairy farm B using PCA, showcasing the distinct division between the two groups based on the identified proteins. b) The number of proteins identified in raw milk samples from dairy farm A and dairy farm B through a Venn diagram.

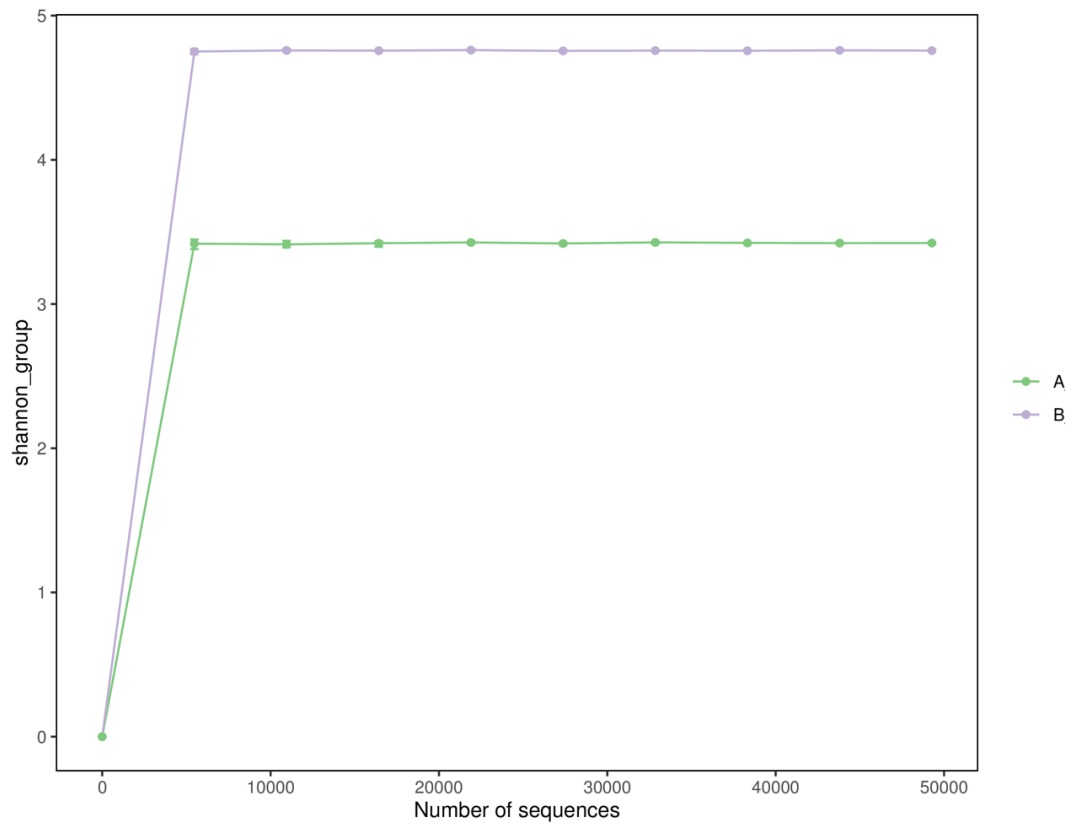

Fig.S1

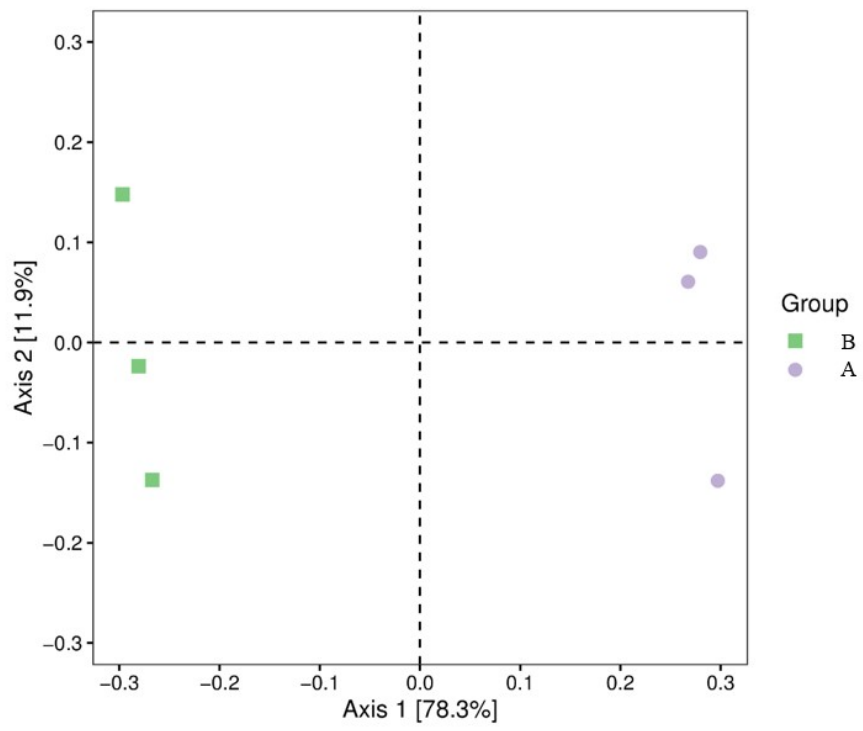

Fig. S2

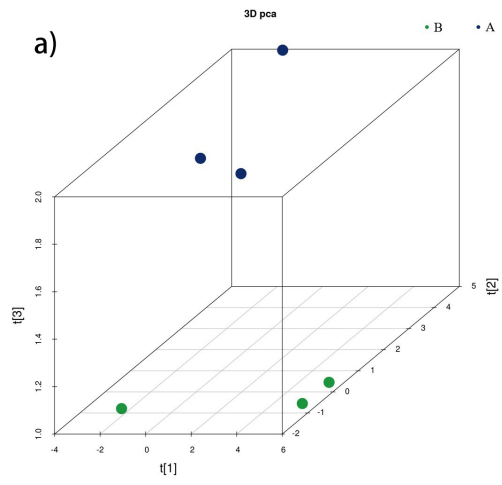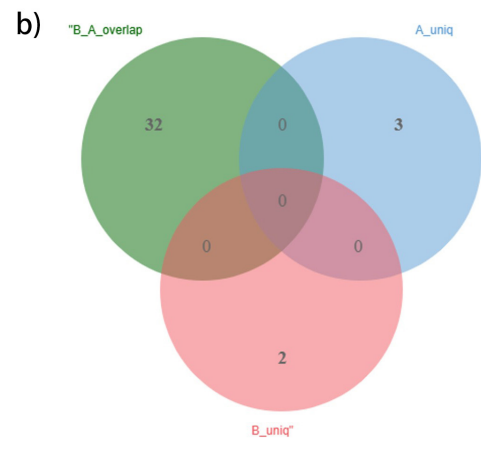

Fig.S3
